# Supplementary material for: A Longitudinal Study of T2 Mapping Combined With Diffusion Tensor Imaging to Quantitatively Evaluate Tissue Repair of Rat Skeletal Muscle After Frostbite
Source: PubMed Central journal article supplement (PMC7868413; doi:10.3389/fphys.2020.597638), 2021-01-25

GAPDH

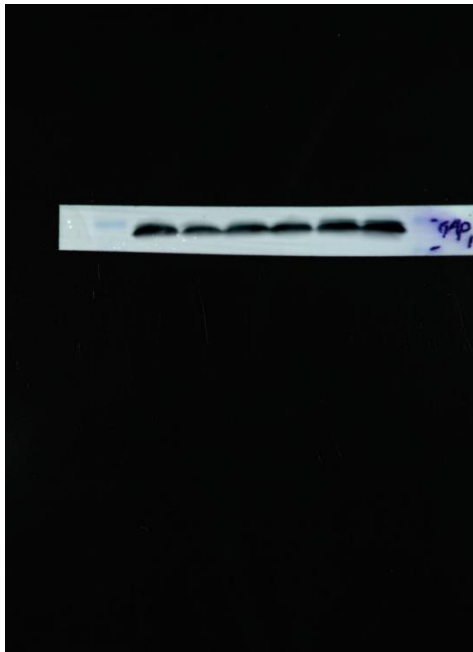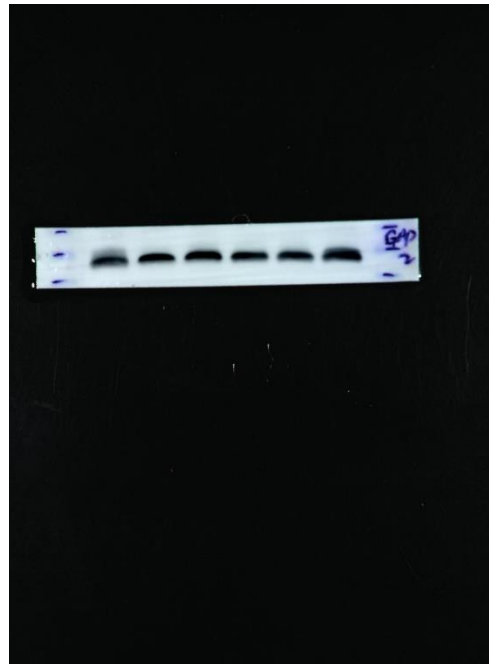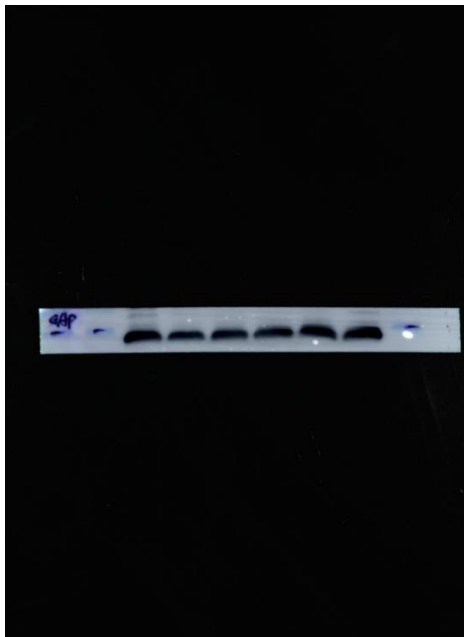

Myod1

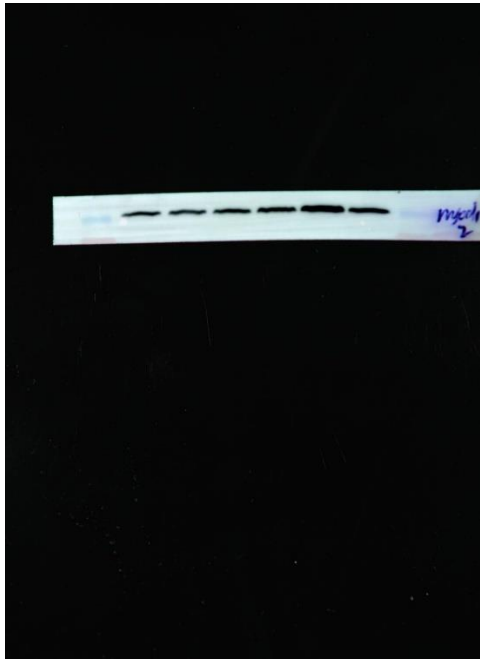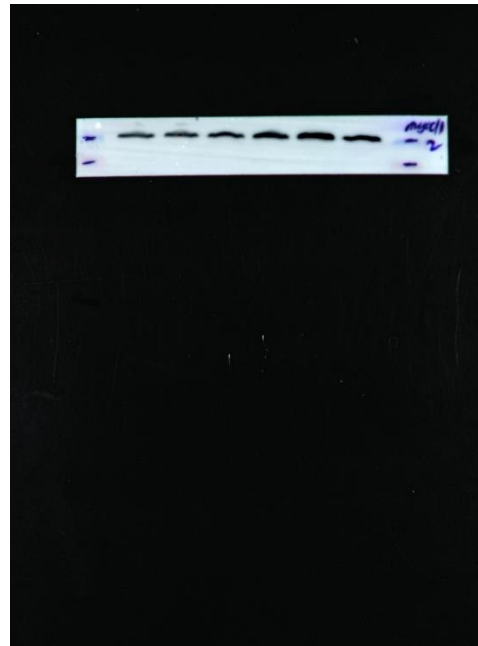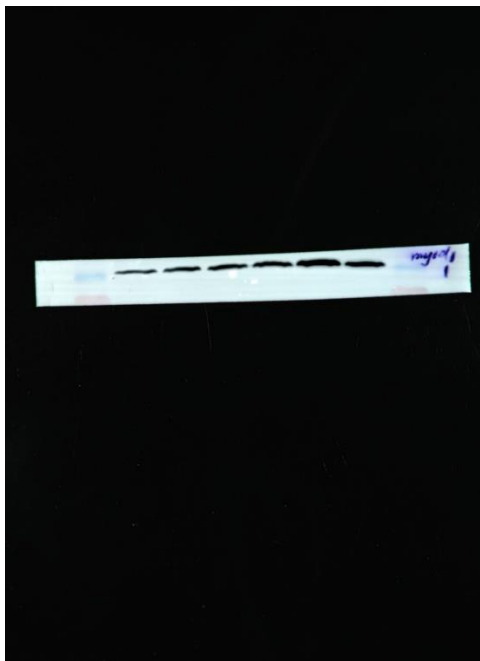

TNF- $\alpha$

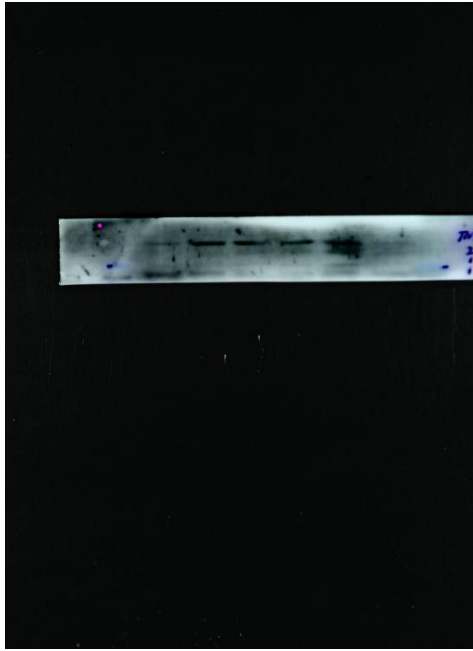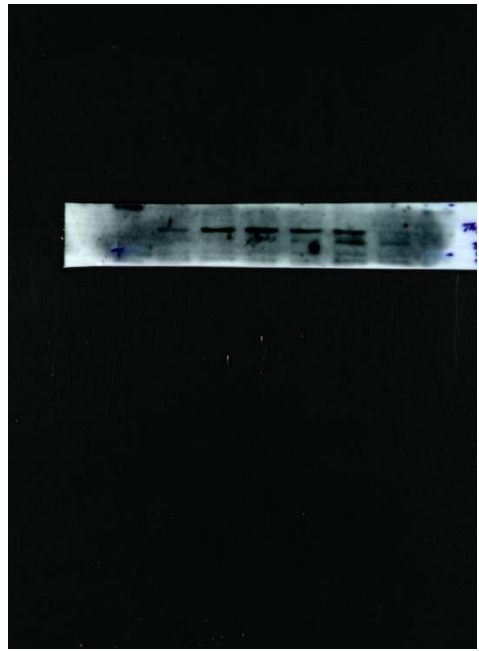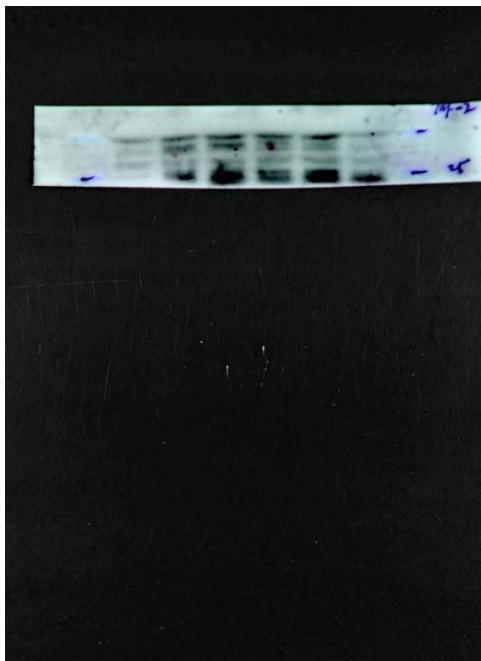

Supplement: Data_Sheet_1.pdf [file Data_Sheet_1.pdf]
